# Supplementary material for: Visible-light-stimulated synaptic InGaZnO phototransistors enabled by wavelength-tunable perovskite quantum dots
Source: Royal Society of Chemistry journal article supplement (doi:10.1039/d1na00410g), 2021-01-01
Supplement: d1na00410g1.pdf [file d1na00410g1.pdf]

## Supporting Information

### Visible-light-stimulated synaptic InGaZnO phototransistors enabled by wavelength-tunable perovskite quantum dots

Zhilong Xin , Yang Tan, Tong Chen, Emad Iranmanesh, Lei Li, Kuan-Chang Chang\*, Shengdong Zhang, Chuan Liu, Hang Zhou\*

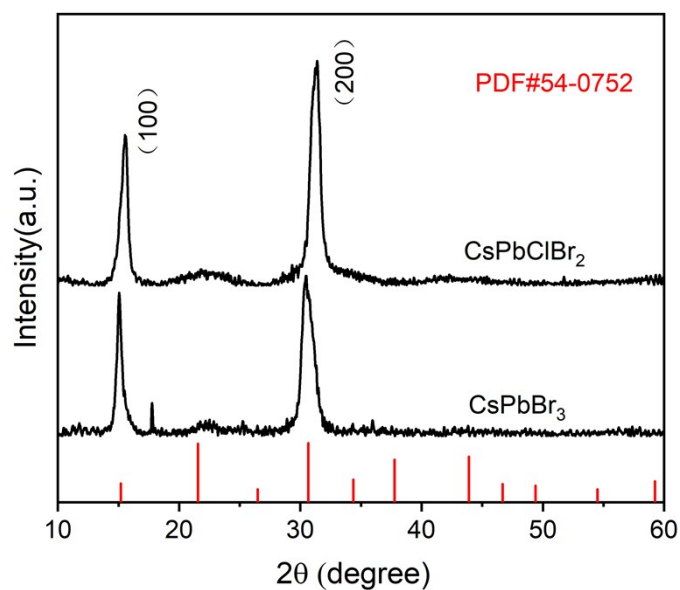

Figure S1. XRD pattern of CsPbClBr<sub>2</sub> QDs and CsPbBr<sub>3</sub> QDs.

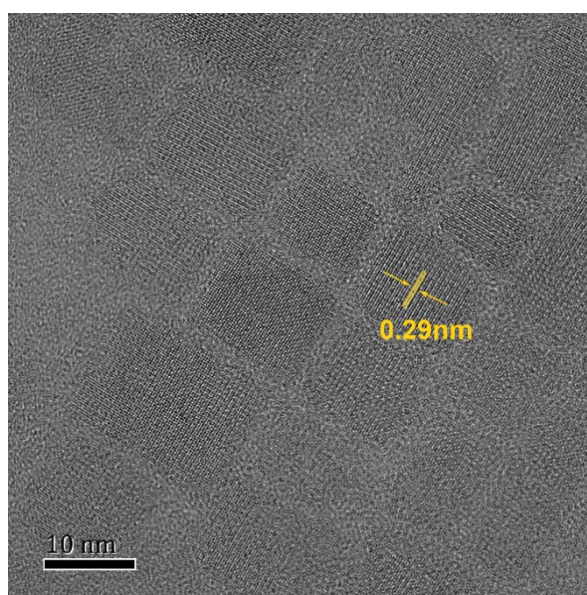

FigureS2. TEM image of CsPbBr<sub>3</sub> QD

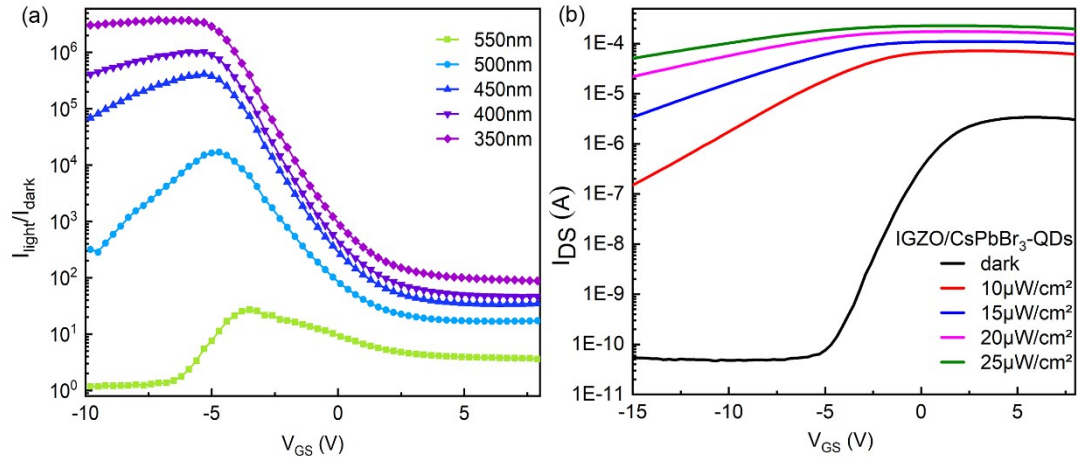

Figure S3 (a) The  $I_{light}/I_{dark}$  ratio values of IGZO/CsPbBr<sub>3</sub>-QDs at different wavelengths of 3.5  $\mu\text{W}/\text{cm}^2$  light intensity ( $V_D = 4\text{V}$ ). (b) Transfer characteristics of IGZO/CsPbBr<sub>3</sub>-QDs as a function of the light intensity at a fixed illuminating wavelength (450nm).

Table S1 Color recognition by using three IGZO TFTs

|       | IGZO | IGZO/CsPbClBr <sub>2</sub> -QD | IGZO/CsPbBr <sub>3</sub> -QD |
|-------|------|--------------------------------|------------------------------|
| UV    | On   | On                             | On                           |
| Blue  | Off  | On                             | On                           |
| Green | Off  | Off                            | On                           |

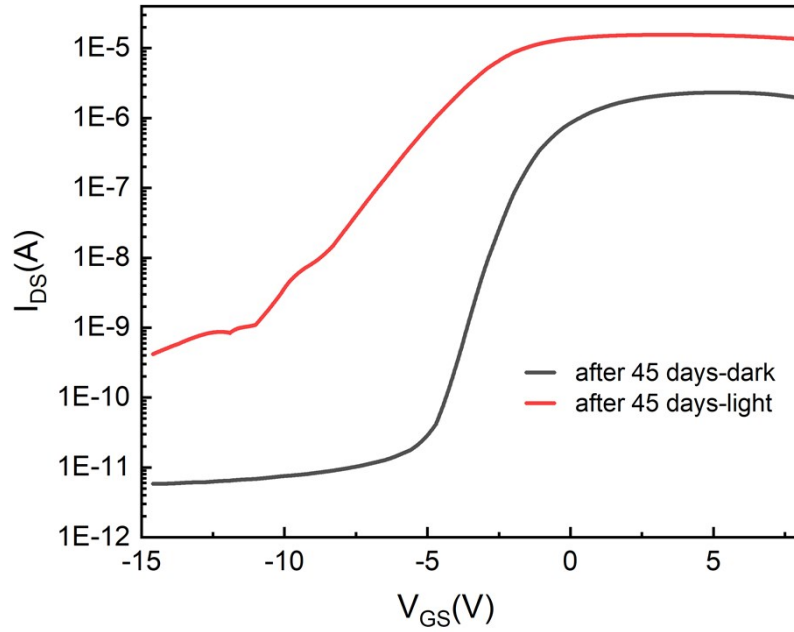

Figure S4. Transfer characteristic of IGZO/CsPbBr<sub>3</sub>-QDs under dark illumination states (450nm, 3.5 $\mu$ w cm<sup>-2</sup>) after 45 days.

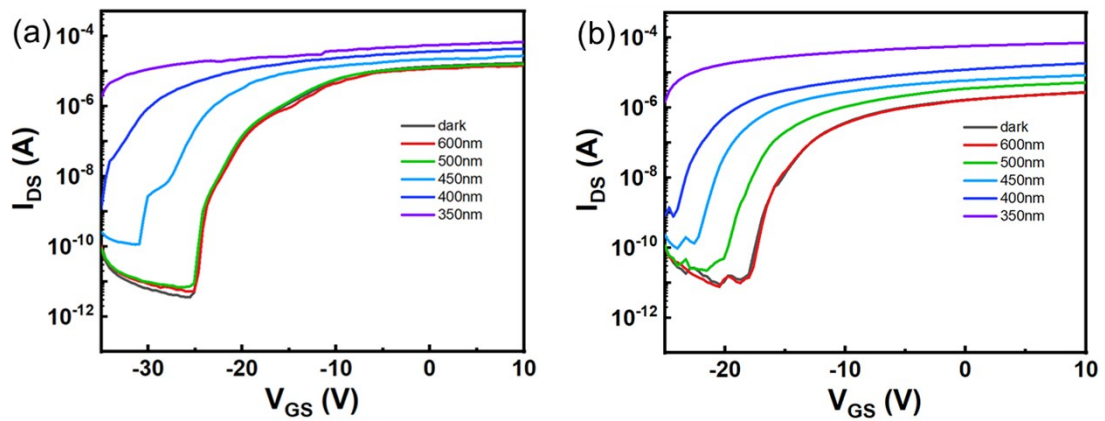

Figure S5. Transfer characteristics of (a) IGZO/CsPbClBr<sub>2</sub>-QD and (b) IGZO/CsPbBr<sub>3</sub>-QD phototransistors ( $V_D = 4V$ ) at different wavelengths measured in  $\sim 8$  months later.

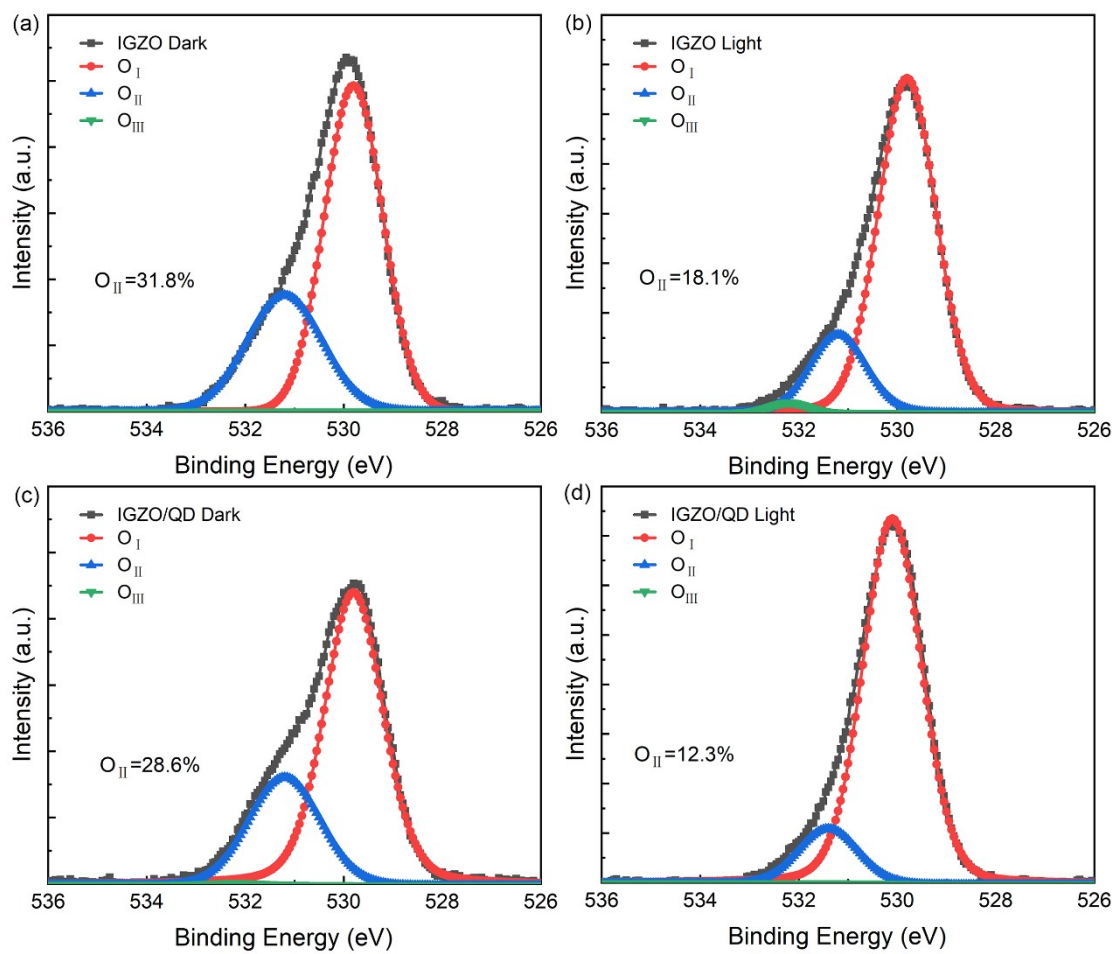

Figure S6. XPS spectra of O 1s of the IGZO and IGZO/CsPbBr<sub>3</sub> QDs/IGZO films before and after white light irradiation.

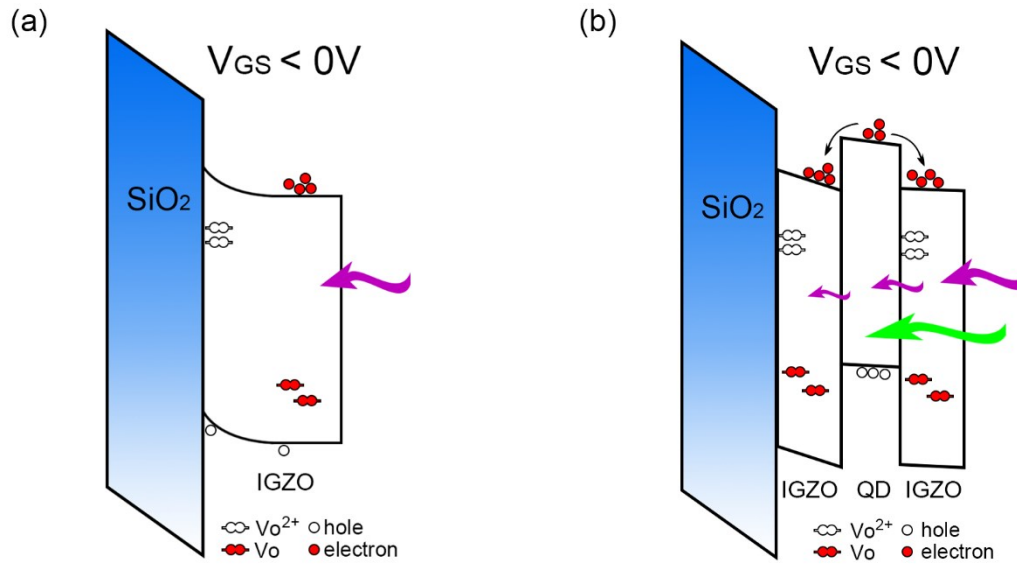

Figure S7. Schematic band diagram of the (a) IGZO device and (b) IGZO/QD device under a negative gate bias and light illumination. The oxygen vacancy  $Vo^{2+}$  in the IGZO layer is excited only under UV irradiation. While irradiated by visible light, only the electron and holes in QDs are separated.
